# Supplementary material for: Transient receptor potential melastatin 3 is a phosphoinositide-dependent ion channel
Source: PubMed Central journal article supplement — J Gen Physiol. 2015 Jul;146(1):65–77. doi: 10.1085/jgp.201411336 (PMC4485020; doi:10.1085/jgp.201411336), 2015-07
Supplement: supp_jgp.201411336_JGP_201411336_sm.pdf [file supp_jgp.201411336_JGP_201411336_sm.pdf]

Badheka et al., <http://www.jgp.org/cgi/content/full/jgp.201411336/DC1>

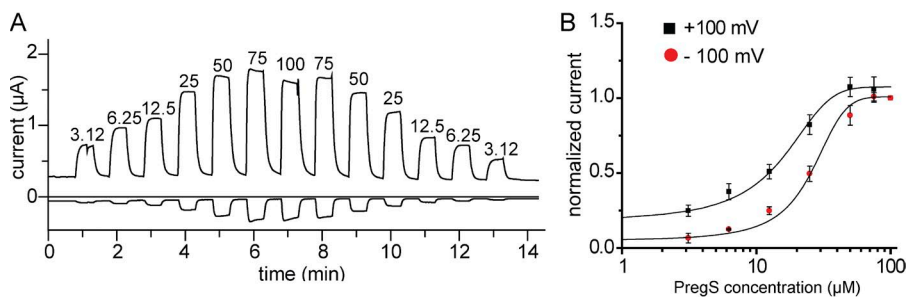

**Figure S1.** Concentration-dependent effects of PregS on hTRPM3. (A) Representative data from a TEVC measurement in a *Xenopus* oocyte showing the effects of the indicated concentrations of PregS ( $\mu\text{M}$ ) on the hTRPM3. Data were plotted from  $-100$  to  $100$ -mV ramp measurements as described in Materials and methods. (B) Concentration-dependent activation of hTRPM3 by PregS; all values normalized to  $100 \mu\text{M}$  ( $n = 5$ ),  $\text{EC}_{50} = 19.3 \mu\text{M}$  at  $100 \text{ mV}$  and  $28.5 \mu\text{M}$  at  $-100 \text{ mV}$ . Error bars represent SEM.

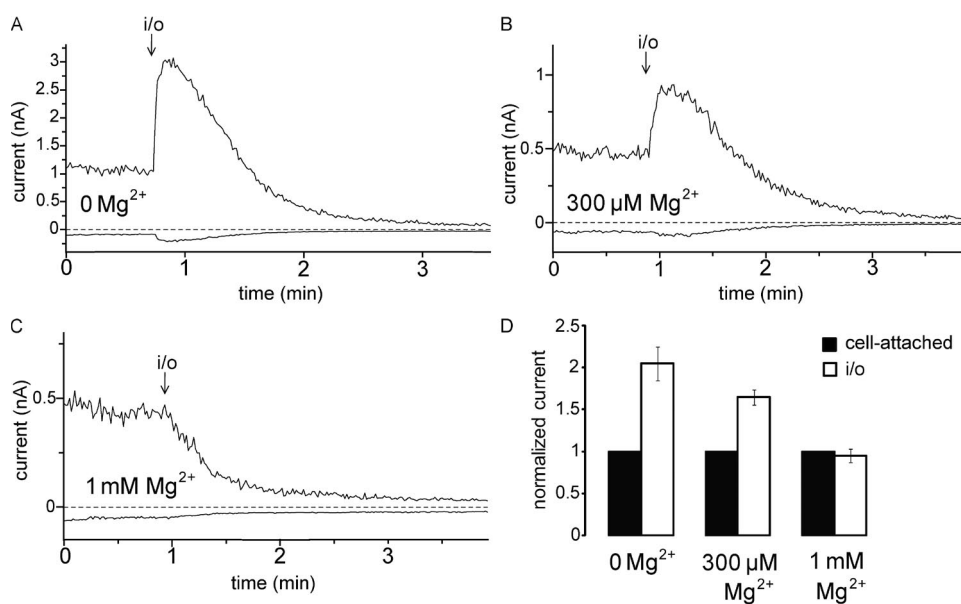

**Figure S2.** The effect of  $\text{Mg}^{2+}$  on the current increase after patch excitation. (A–C) Representative traces at  $100$  and  $-100 \text{ mV}$ ; experiments were performed on hTRPM3-expressing *Xenopus* oocytes with  $100 \mu\text{M}$  PregS in the patch pipette as described in Materials and methods. Patches were excised into a bath solution with no  $\text{Mg}^{2+}$ ,  $300 \mu\text{M}$   $\text{Mg}^{2+}$ , or  $1 \text{ mM}$   $\text{Mg}^{2+}$ , as indicated. (D) Statistics; the mean of the currents at  $100 \text{ mV}$  in the first  $8 \text{ s}$  after excision was measured and normalized to the currents before excision ( $n = 6-7$ ). Error bars represent SEM.

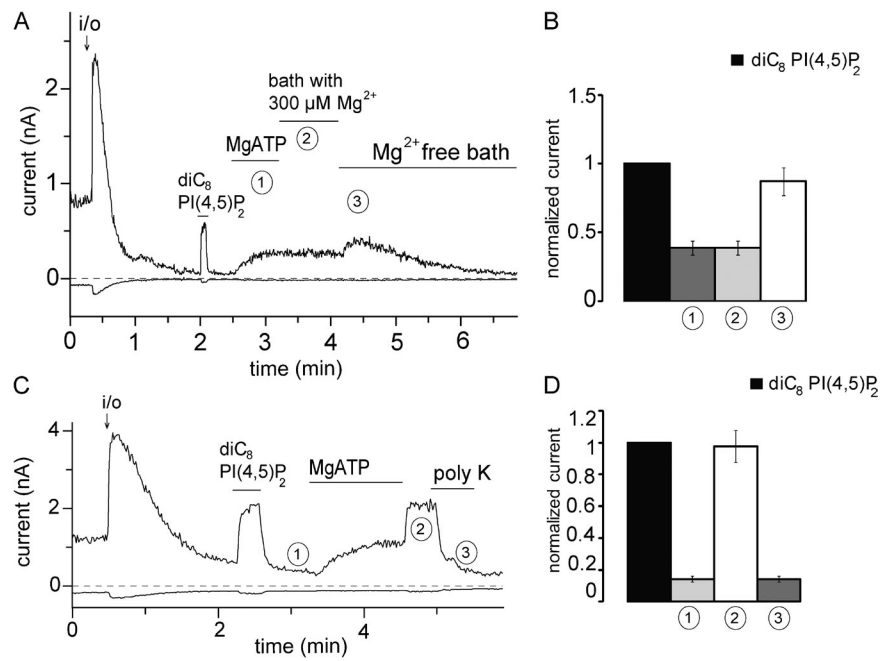

**Figure S3.** The effect of  $Mg^{2+}$  on the current increase after washout of MgATP and the effect of Poly-Lys after MgATP. Experiments were performed on hTRPM3-expressing *Xenopus* oocytes with 100  $\mu M$  PregS in the patch pipette as described in Materials and methods; data are shown at 100 and  $-100$  mV. (A) Representative trace; the applications of 25  $\mu M$  diC<sub>8</sub> PI(4,5)P<sub>2</sub>, 2 mM MgATP (free [Mg] = 300  $\mu M$ ), bath solution containing 300  $\mu M$   $Mg^{2+}$ , and  $Mg^{2+}$ -free bath solution are indicated by the horizontal lines. (B) Summary of the data in A ( $n = 5$ ). (C) Representative measurement showing the effect of 25  $\mu M$  diC<sub>8</sub> PI(4,5)P<sub>2</sub>, 2 mM MgATP, and 30  $\mu g/ml$  Poly-Lys. (D) Summary of the data in C ( $n = 3$ ). Error bars represent SEM.

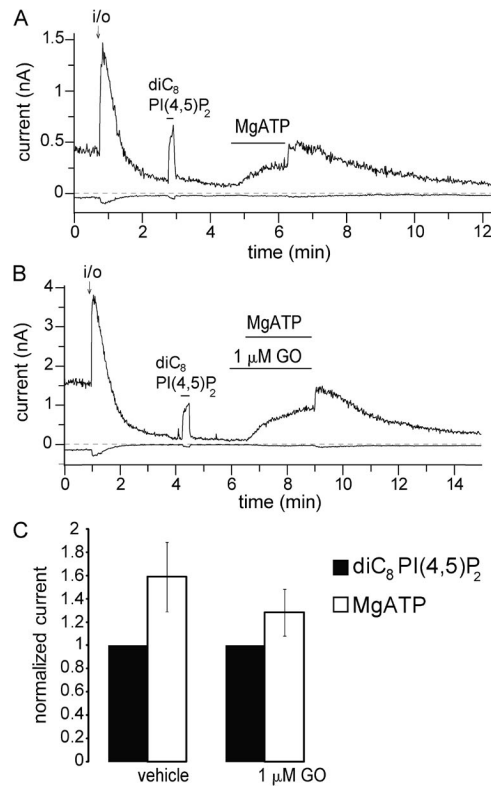

**Figure S4.** PKC inhibition does not affect MgATP. Excised inside-out patch measurements have been performed on hTRPM3-expressing *Xenopus* oocytes with 100  $\mu$ M PregS in the patch pipette as described in Materials and methods; data are plotted at 100 and  $-100$  mV. (A and B) Representative traces for the effects of MgATP in the absence and presence of the PKC inhibitor Gö6976 (GO); the applications of 2 mM MgATP, 1  $\mu$ M Gö6976, and 25  $\mu$ M diC<sub>8</sub> PI(4,5)P<sub>2</sub> are indicated by the horizontal lines. (C) Summary of the data for control and PI-PLC-treated patches ( $n = 5$ ). Error bars represent SEM.

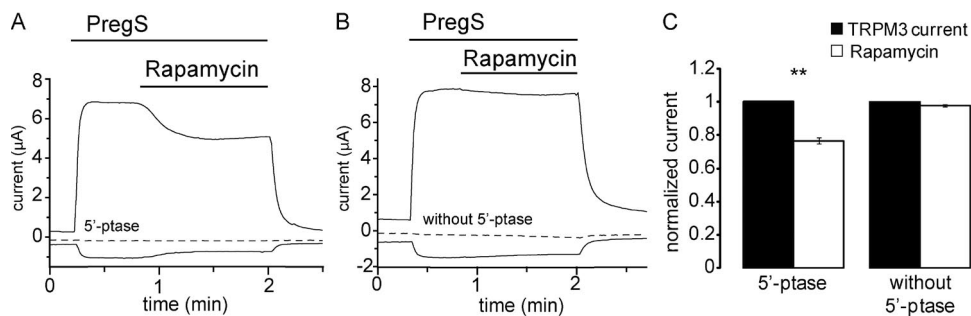

**Figure S5.** The effect of rapamycin-inducible 5'-phosphatase in *Xenopus* oocytes. (A) Representative TEVC measurement in a *Xenopus* oocyte expressing hTRPM3 and the components of the rapamycin-inducible 5'-phosphatase system. Measurements were performed using a ramp protocol from  $-100$  to  $100$  mV, and current amplitudes are plotted at 100 and  $-100$  mV. The applications of 100  $\mu$ M PregS and 1  $\mu$ M rapamycin are indicated by the horizontal lines. (B) Similar experiment as in A in a control oocyte, expressing TRPM3 and the components of the rapamycin-inducible system without the 5'-phosphatase. (C) Statistical summary of the data at 100 and  $-100$  mV ( $n = 4-5$ ). Error bars represent SEM. \*\*,  $P < 0.01$ .
